## pRB, p107 and the regulation of the E2F transcription factor

Nicholas Dyson

Laboratory of Molecular Oncology, Massachusetts General Hospital Cancer Center, Building 149, 13th Street, Charlestown, MA 02129, USA

### SUMMARY

Small DNA tumor viruses, such as adenovirus, encode proteins that deregulate the cell cycle. These proteins are potent transforming agents when tested in standard oncogenic assays. For adenovirus the best characterized viral oncoproteins are the early region 1A (E1A) products. Mutational studies have shown that E1A's oncogenic ability is determined primarily by its ability to bind to certain cellular proteins and interfere with their function. One of these cellular targets for E1A is the product of the retinoblastoma tumor suppressor gene, pRB. pRB is a negative regulator of cell proliferation, and its inactivation has been shown to be an important oncogenic step in the development of many human cancers. In adenovirus-mediated transformation, E1A binds to pRB and inactivates it, thus functionally mimicking the loss of pRB often seen in human tumors.

There is now compelling evidence to suggest that pRB regulates transcription at specific phases of the cell cycle by physically associating with key transcription factors. The best characterized target of pRB is the transcription factor E2F. The interaction of pRB and E2F leads to the inhibition of E2F-mediated transactivation. Most of the genes that are known to be controlled by E2F have key roles in the regulation of cell proliferation. During cell cycle progression, phosphorylation of pRB appears to change its conformation and E2F is released. In pathogenic settings E2F transactivation is not regulated by pRB binding. In human tumors with mutations in the retinoblastoma gene, functional pRB is absent and hence can no longer inhibit

E2F activity. During adenovirus transformation, E1A binds to pRB and displaces E2F. In both these cases, E2F is released from pRB-mediated regulation at inappropriate times. The activation of these E2F-responsive genes may lead to the stimulation of cell proliferation. While we do not know whether E2F is the only target for pRB action, this work has formed a general picture of how tumor suppressor gene products such as pRB can control specific transcriptional events and act as negative regulators of cell growth.

Recent experiments have shown that E2F represents the combined activity of an extensive series of protein complexes. There are at least five genes that encode E2F polypeptides, and probably several more have yet to be identified. The E2F transcription factor is a heterodimer composed of two related polypeptides, one encoded by a member of the E2F gene family and the other by a member of the DP family. Intriguingly DP and E2F genes are also found in *Drosophila* and these may provide alternative approaches to the investigation of E2F function. In mammalian cells E2F/DP heterodimers are regulated, at least in part, by the formation of many larger complexes. E2F is found in separate complexes with pRB, p107/cyclin A/cdk2 or p107/cyclin E/cdk2, and additional complexes exist that have yet to be fully characterized. These E2F complexes are detected at specific points of the cell cycle and appear to provide different elements of E2F regulation.

Key words: pRB, p107, E2F transcription factor, regulation

### pRB AND p107 ARE CELLULAR TARGETS FOR E1A-MEDIATED TRANSFORMATION

The E1A proteins are the first viral proteins to be synthesized during adenovirus infection (Lewis and Mathews, 1980; Nevins, 1981). Although these proteins are multifunctional, their overall function is to alter infected cells, changing their metabolism for a state more conducive for viral propagation. When E1A is studied by itself in the absence of other viral functions, it proves to be a potential nuclear oncoprotein. These activities are thought to drive cell cycle progression into S phase, where viral DNA synthesis can begin.

The regions of E1A that enable it to drive cell cycle progression correspond closely to the regions that are essential for E1A's oncogenic properties (Howe et al., 1990; Howe and

Bayley, 1992). These regions include several domains that allow the interaction with cellular proteins (Whyte et al., 1989). There are two major classes of interaction, one with a cellular protein known as p300 and one with a group of related proteins that include pRB, p107, and p130. These two classes of interaction can be distinguished by the regions on E1A that make the contacts with the cellular proteins. Binding to p300 requires the amino-terminal regions of E1A between residues 1 and 76, while binding to pRB, p107, and p130 requires two independent interaction domains encompassing residues 35-60 and 120 to 127 (Whyte et al., 1989; Giordano et al., 1991a,b). Mutations in either region, which destroy the ability of E1A to bind to these cellular proteins, destroy E1A's ability to act as an oncogene.

Analysis of E1A's binding to pRB, p107, and p130 has

shown that these proteins are found in separate complexes, with E1A using similar sequences to bind to each protein independently. Adenovirus is not the only DNA tumor virus that encodes proteins that can bind to these cellular proteins. Both the polyomaviruses, best represented by SV40, and the human papillomaviruses encode proteins that bind to pRB and p107 (DeCaprio et al., 1988; Dyson et al., 1989a,b, 1992; Ewen et al., 1989). In vitro binding experiments suggest that these viral proteins will also bind to p130. Large T antigens of the polyomaviruses and the E7 proteins of human papillomaviruses show structural homologies to E1A in the regions that are needed to bind to pRB and p107 (Stabel, 1985; Figge et al., 1988; Phelps et al., 1988). In these viruses too, the pRB- and p107-binding regions are important for the viral proteins to act as oncogenes (Ewen et al., 1989; Munger et al., 1989; Larose et al., 1990). Thus, it appears that many small DNA viruses target cellular proteins such as p107 and pRB and that these interactions are an integral part of the oncogenic properties of their early products.

## THE RETINOBLASTOMA TUMOR SUPPRESSOR GENE

The *RB-1* gene was the first tumor suppressor gene to be isolated and recognized for its involvement with human cancer. Inactivation of both copies of the *RB-1* gene has been found in 100% of retinoblastomas, and the inheritance of a mutated *RB-1* allele has been shown to be the genetic lesion in familial retinoblastoma (reviewed by Weinberg, 1988, 1992). Following the isolation of the *RB-1* gene considerable effort was focused into determining the biochemical function of its protein product (pRB). Although initial progress was slow, discoveries made during the last two to three years have allowed the development of models for the function of pRB. Many lines of evidence indicate that pRB serves as a regulator of transcription factors. Several factors have been shown to bind to pRB, including c-myc, N-myc, E2F (also called DRTF1), *elf1*, PU1, myoD, myogenin, ATF2 and *abl* (Bandara and La Thangue, 1991; Chellappan et al., 1991; Rustgi et al., 1991; Kim et al., 1992; Gu et al., 1993; Hagemeyer et al., 1993; Wang et al., 1993; Welch and Wang, 1993). Of these, the best studied is the transcription factor E2F, and the pRB/E2F interaction is discussed in more detail below. E2F-mediated transcription is inhibited by its association with pRB (Hiebert et al., 1992; Zamanian and La Thangue, 1992; Helin and Harlow, 1993). pRB binding has also been proposed to repress several other factors, including c-myc, N-myc, *Elf-1*, PU1 (Rustgi et al., 1991; Hagemeyer et al., 1993; Wang et al., 1993). Although these complexes are less well studied than E2F, the available data suggests that these interactions have many similarities to the E2F/pRB complex. In other cases (ATF-2, MyoD and myogenin) the pRB interaction is less well understood but may be fundamentally different since the association is proposed to cause transcriptional activation (Kim et al., 1992; Gu et al., 1993; Wang et al., 1993).

The *RB-1* gene is the prototype for all tumor suppressor genes. Loss or mutation of both *RB-1* alleles is a key step in the tumorigenic progression of many human cancers (see, for example, Weinberg, 1990). This loss or inactivation of functional pRB removes an inhibitor to cell proliferation and

thereby promotes inappropriate division. Since E1A is a positively acting oncoprotein, the demonstration that pRB was one of the proteins bound to E1A led to a suggestion that E1A overcame pRB's negative regulatory role, mimicking the loss of pRB seen in many tumors (Whyte et al., 1988). Further work has shown that model to be correct.

## A FAMILY OF POCKET PROTEINS - POTENTIAL CELL CYCLE REGULATORS

p107 was first identified through its interaction with the adenovirus early protein E1A (Yee and Branton, 1985; Harlow et al., 1986). The study of p107 has drawn further attention following the cloning of a partial cDNA by Ewen et al. (1991). This original clone represents the carboxy-terminal 90% of the full-length coding region for p107 recently isolated by Zhu et al. (1993). Many of the properties of p107, including how it interacted with E1A, suggested that it would be related to pRB. The sequence of the first p107 clone proved these suggestions correct (Ewen et al., 1991). p107 and pRB have 7 regions of recognizable sequence homology, the best homology showing 62% identity. Not surprisingly, a great deal of the homology was found in a region that corresponds to the binding site for E1A. This region, which has become known as the 'pocket', is composed of two essential segments separated by a 'spacer' region that is required for binding but whose sequence is irrelevant for interaction. In addition there is good homology in the carboxy-terminal region of pRB and p107.

The recent cloning of p130 has revealed that it is closely related to pRB and p107 (Hannon et al., 1993; Li et al., 1993; Mayol et al., 1993). The p130 protein also contains a pocket-domain structure that mediates its interaction with E1A. Sequence comparisons show that p130 and p107 are more closely related to one another than to pRB. This is most apparent in the comparisons of the spacer domains. Studies of p107 have shown that the spacer region contains a high-affinity binding site for the cyclin A/cdk2 and cyclin E/cdk2 kinases (Ewen et al., 1992; Faha et al., 1992, 1993) and analogous complexes may also exist for p130 (Hannon et al., 1993; Li et al., 1993). Although the spacer sequences of p107 and p130 are 44% identical neither sequence has any homology with the spacer domain of pRB and it appears that the stable association with cyclin-dependent kinases is a feature that distinguishes p107 and p130 from pRB. The function of these complexes are unknown; however, the stoichiometry is high. Up to 50% of the p107 found in the cell is associated with these cyclin/cdk complexes. This high level of interaction suggests that they are likely to play an important role in the action of p107 and p130.

Several approaches have been used to demonstrate that the reintroduction of pRB into tumor cells that lack a normal *RB-1* can cause cell cycle arrest (Goodrich et al., 1991; Hinds et al., 1992). Analogous experiments have shown that p107, when transiently expressed at high levels after transfection, can also cause cell cycle arrest (Zhu et al., 1993). In these experiments p107 was cotransfected with a second plasmid that expresses a cell surface marker that enables transfected cells to be identified after flow cytometry. Comparison between the growth suppression properties of pRB and p107 has enabled some initial conclusions to be drawn (Zhu et al., 1993). Many

cell lines are unaffected by the overexpression of pRB and p107, even cell lines such as J82 that lack a functional *RB-1* gene. A few cell lines, however, appear to be sensitive to these proteins and expression causes cell cycle arrest. Saos-2 cells, an osteosarcoma cell line, respond to pRB and p107 in a similar manner and arrest in G<sub>1</sub>. However, the responses are not identical in other cells. In C33A cells, the overexpression of p107 caused cell cycle arrest in G<sub>1</sub>, but the expression of pRB did not. This was one of the first indications that pRB and p107 have distinguishable functional characteristics. A second feature of these experiments reinforced this suggestion. These differences are apparent in the ability of various other genes to overcome growth arrest in G<sub>1</sub> induced by pRB or p107. Hinds et al. (1992) have demonstrated that co-transfecting G<sub>1</sub> cyclins overcomes the pRB arrest. However, in similar conditions these cyclins had little effect on the p107 block (Zhu et al., 1993). Similarly the over-expression of the E2F-1 gene overcame the pRB block but had no effect on the p107 arrested cells. Conversely the adenovirus E1A protein, which binds to both pRB and p107, overcame the p107 arrest with considerably greater efficiency than the pRB arrest. These different rescue properties provided a further indication that pRB and p107 have related but distinct potential for growth arrest.

## THE E2F TRANSCRIPTION FACTOR

The first clues to the biochemical role of pRB came from other viral studies looking at the activation of the E2 promoter of adenovirus. Following infection, the E2 promoter is transactivated by E1A. One of the regions of the promoter that allowed E1A transactivation was called E2F for E2 factor (Yee et al., 1987). Adenovirus E1A activates transcription from the E2 promoter by releasing active E2F from inhibitory complexes (Bagchi et al., 1993). When the regions of E1A that were needed to cause this transactivation were mapped they corresponded with the regions that were needed to bind to pRB, p107, and p130 (Raychaudhuri et al., 1991). Purified E2F was examined and shown to be physically associated with pRB (Bagchi et al., 1991; Chellappan et al., 1991). More recent work has shown that by binding to E2F, pRB is able to inhibit E2F-mediated transcription (Hiebert et al., 1992; Zamanian and La Thangue, 1992; Helin and Harlow, 1993). Thus, one role of pRB is to bind to E2F and inhibit transcription. E1A breaks apart this interaction and leads to the activation of E2F-mediated transcription.

Purification of E2F on DNA-affinity columns suggested that it was a heterogeneous factor and that DNA binding required at least two different components (Huber et al., 1993). This impression has been confirmed by the cloning of at least 5 genes encoding components of E2F (Helin et al., 1992; Kaelin et al., 1992; Shan et al., 1992; Girling et al., 1993; Ivey-Hoyle et al., 1993; Lees et al., 1993). These genes fall into two classes, termed E2F or DP, whose products heterodimerize to produce a DNA-binding complex capable of activating transcription from promoters containing E2F sites (Bandara et al., 1993; Helin et al., 1993). In transient transfections the products of any one of the E2F-1, E2F-2, and E2F-3 genes heterodimerize with either of the DP-1 or DP-2 encoded proteins producing a transcriptional activator (J. Lees and C.-L. Wu, personal communication). Northern analyses suggest that some of these genes may be differentially expressed, but no func-

tional differences between these complexes are known (Lees et al., 1993).

The cloning of E2F genes has allowed a detailed examination of the pRB/E2F interaction. pRB binds directly to the transactivation domain of E2F and represses its activity (Helin et al., 1994). This interaction appears to be regulated in several ways. One of the mechanisms of regulation appears to be at the level of protein phosphorylation. pRB contains several sites that are substrates for many of the cyclin-dependent kinases (cdks) that are active at discrete points of the cell cycle, and pRB becomes heavily phosphorylated as cells progress from G<sub>1</sub> into S phase (Buchkovich et al., 1989; Chen et al., 1989; DeCaprio et al., 1989; Mihara et al., 1989). Despite this, only the un- or underphosphorylated forms of pRB are found associated with E2F (Chellappan et al., 1991; Helin et al., 1992; Kaelin et al., 1992), thus the release of E2F from pRB may provide a temporal control to E2F activity.

## POTENTIAL TARGETS FOR E2F

One of the outcomes of this regulation is that adenovirus infections lead to the activation of E2F-mediated transcription. While adenovirus has an early promoter that is activated by E2F, there are no E2F-responsive promoters in the polyomaviruses or the papillomaviruses. Therefore, the target promoters that are affected by viral proteins binding to pRB must be different for adenovirus. A potential answer to this problem comes from the demonstration that many cellular promoters that control genes involved in growth control also have E2F sites. These genes include those encoding c-myc, N-myc, b-myb, DNA polymerase- $\alpha$ , DHFR, thymidine kinase, thymidylate synthase, cdc2, and cyclin A (for a review see (Nevins, 1992; Helin and Harlow, 1993). In the c-myc, DHFR, b-myb, thymidine kinase, and cdc2 promoters the E2F sites have been shown to be essential for the transcriptional activation of these genes that occurs as serum-starved cells are stimulated to progress through the cell cycle (Blake and Azizkhan, 1989; Hiebert et al., 1989; Thalmeier et al., 1989; Dalton, 1992; Means et al., 1992; Lam and Watson, 1993). In this experimental system, the presence of a short element carrying 2 overlapping E2F sites has been shown to be sufficient for the temporal expression of the DHFR gene at the G<sub>1</sub> to S transition (Slansky et al., 1993). The view that emerges from these studies is that the transcription of a broad range of important growth-regulating genes appears to be regulated by E2F or E2F-related proteins.

Based on this information, the loss of pRB function is predicted to deregulate the transcription of E2F-responsive genes. The notion that this may contribute to the deregulation of cell cycle control is supported by several observations. First, the microinjection of E2F-1 protein stimulates DNA synthesis in quiescent cells (Johnson et al., 1993). Second, transfection of E2F-1 into WI38 fibroblasts inhibits cell cycle arrest upon serum withdrawal (Johnson et al., 1993). Third, the recent finding that Chinese hamster ovary cells are fully transformed by the cotransfection of E2F-1 and DP-1 (N. Heintz, personal communication). Fourth, the E2F-1 gene appears to undergo genetic rearrangements in some leukemias (Saito et al., 1994). All of these data point to an important role for E2F in the control of cell proliferation.

## THERE ARE MANY E2F COMPLEXES

pRB is only one of several regulators of E2F. When extracts from various cell lines were tested for protein complexes that can bind specifically to E2F oligonucleotides, at least two major complexes were detected. One of these was identified as the pRB/E2F complex (Bandara and La Thangue, 1991; Chelappan et al., 1991). The other larger complex was originally demonstrated to contain cyclin A (Mudryj et al., 1991). The appearance of cyclin A in the complex prompted several labs to investigate whether other proteins might be found in this complex. Work from several groups showed that this E2F-binding complex contains p107, cyclin A, and cdk2 (Cao et al., 1992; Devoto et al., 1992; Shirodkar et al., 1992). Further analysis of p107/E2F showed that it actually contained two complexes, one with E2F/p107/cyclin A/ckd2 and one with E2F/p107/cyclin E/ckd2 (Lees et al., 1992). Surprisingly, these complexes exist in different stages of the cell cycle. The cyclin E/ckd2 version is found in G<sub>1</sub>, while the cyclin A/ckd2 E2F/p107 complex is found in S phase.

Bandshift experiments using extracts from synchronized cells showed that serum-starved cells and cells that were early in G<sub>1</sub> phase contained E2F complexes that did not appear to contain either pRB or p107 (Mudryj et al., 1991; Shirodkar et al., 1992). Recently Cobrinik et al. (1993) have demonstrated that these complexes contain the p130 protein, and like p107, the p130/E2F complexes can also be formed with cyclin dependent kinases. By analogy with pRB, p107 and p130 may also be repressors of E2F activity. During adenovirus infection E1A dissociates all of the pRB-, p107-, and p130-E2F complexes and this correlates with the activation of E2F. Furthermore the transient overexpression of p107 has been shown to repress the activity of both endogenous and exogenous E2F (Schwarz et al., 1993; Zamanian and Thangue, 1993; Zhu et al., 1993).

The E2F complexes with p107 and p130 provide an added level of intrigue. Most of the E2F/p107 and E2F/p130 DNA-bound complexes contain stoichiometric levels of the cdk. These complexes provide a direct connection between the kinases that regulate cell cycle progression and the temporal expression of genes that are required for cell proliferation. It is widely speculated that this connection is important for the functions of both the kinases and E2F, but the consequence of the interaction is unclear. Many models have been proposed; examples are: that the complex targets the kinase to a DNA-bound substrate; that the complex targets the kinase to E2F/DP (conceivably it switches the factor on or off); that the kinase phosphorylates p107 or p130 and regulates the p107/E2F or p130/E2F interaction; that E2F/DP sequesters the kinase away from other substrates.

## pRB AND p107 ASSOCIATE WITH DIFFERENT E2FS

Work in the last several months has emphasized the differences between pRB and p107. Analysis of the polypeptides that coprecipitate with p107 and pRB has revealed that DP-1 and DP-2 are associated with both pRB and p107 (Girling et al., 1993; C.-L. Wu and J. Lees, personal communication) but that the E2F components of the heterodimers differ (Dyson et al., 1993; Lees et al., 1993). The E2F polypeptides migrate differently on

SDS-PAGE and yield different patterns after partial proteolytic digestion. Furthermore, antibodies raised against the products of cloned E2F genes differ in their ability to recognize the pRB-associated and p107-associated E2F proteins. Polyclonal antisera specific for E2F-1, E2F-2 and E2F-3 all immunoprecipitate pRB-associated E2F but fail to recognize p107-associated E2F (Dyson et al., 1993; Lees et al., 1993). To date only one E2F-1 antibody, a pan-reactive anti-peptide antibody that was raised against the pRB-binding domain of E2F-1, has been found to immunoprecipitate both pRB- and p107-associated E2F polypeptides. These findings suggest that pRB and p107 regulate different forms of E2F. Thus, although p107 and pRB both associate with E2F they appear to provide different elements of the regulation. It is unclear whether pRB-E2F and p107-E2F regulate a single set of genes in different ways or whether they act on different E2F-responsive promoters

## ADDITIONAL TIERS OF E2F REGULATION

Several lines of evidence suggest that there may be tiers of regulation in addition to the interactions mentioned above. Phosphorylation of E2F is likely to be one mechanism of control. Early studies of partially purified E2F indicated that DNA-binding activity was influenced by phosphorylation state and many of the E2F polypeptides undergo extensive modifications (Bagchi et al., 1989; Yee et al., 1989). It is also clear that the levels of E2F proteins are an additional point of regulation. Initial studies of E2F-1 have revealed that the level of E2F-1 mRNAs and proteins are under strong regulation during the cell cycle, as E2F-1 mRNA is not found in G<sub>0</sub> cells (Kaelin et al., 1992). Raychaudhuri et al. (1991) have shown that dissociation of E2F complexes by detergent treatment greatly increases the total amount of E2F-DNA binding activity, suggesting that the DNA-binding activity of E2F was regulated by protein association. These workers purified a subset of E2F/pRB complexes that were unable to bind to DNA (Bagchi et al., 1991) and identified an associated inhibitory factor that modulated the DNA-binding properties of E2F/pRB complexes (Ray et al., 1992). Although the E2F/pRB complexes are not predicted to have transactivating properties, they may play an important role in regulation of gene expression. Such a role was suggested by Weintraub et al. (1992) who observed that E2F sites can act as silencing elements in the presence of high levels of pRB.

There are also some indications that the phosphorylation of pRB may not be the only regulator of the pRB/E2F interaction. Experiments using synchronized cells suggest that some of the pRB/E2F complexes persist late into S-phase (Shirodkar et al., 1992; Schwarz et al., 1993) by which time the majority of pRB is heavily phosphorylated and the transcription of many of the proposed E2F-regulated genes has already been elevated. This may indicate that different complexes are regulated at different times or that E2F transactivation has occurred prior to the disappearance of the pRB/E2F complex, presumably at a time when the pRB/E2F complex is not fully dissociated by pRB phosphorylation. It has been known for several years that some cell lines (the F9 embryonal carcinoma cell line is probably the best studied example) have normal levels of E2F and pRB but lack any of the larger E2F complexes (La Thangue et al., 1990). It has been suggested that these cells contain an E1A-

like activity that inhibits the pRB/E2F interaction, although the nature of this activity is unknown.

## E2F GENES IN *DROSOPHILA*

All this supports the notion that the normal regulation of E2F in mammalian cells is a highly complex process, and it is clear that the E2F/pRB complex is only one aspect of an intricate network of controls. Currently, many groups are studying the biochemistry of E2F complexes. However, many of the fundamental questions about E2F function have yet to be addressed and a full investigation of E2F regulation will require both genetic and biochemical approaches.

To complement ongoing biochemical studies of E2F we have isolated E2F and DP genes from *Drosophila* and demonstrated that they are functional homologs of the human E2F genes in transactivation (Dymlacht et al., 1994). Both of the genes have been localized to regions of the *Drosophila* genome that have been extensively studied. If mutation of these genes leads to a clear phenotype then it may be possible to use genetic approaches to study the E2F pathway. Such a system may provide a unique opportunity to investigate the composition of the E2F pathway and its function. In particular it would be interesting to determine whether the E2F pathway is essential for viability and to investigate the role of E2F in normal development.

I thank Ed Harlow for his support, Jackie Lees and Chin-Lee Wu for communication of data prior to publication, Li-Huei Tsai for help with the writing of this manuscript, and members of the Molecular Biology Laboratory for stimulating discussions.

## REFERENCES

- Bagchi, S., Raychaudhuri, P. and Nevins, J. R. (1989). Phosphorylation-dependent activation of the adenovirus-inducible E2F factor in a cell-free system. *Proc. Nat. Acad. Sci. USA* **86**, 4352-4356.
- Bagchi, S., Raychaudhuri, P. and Nevins, J. R. (1990). Adenovirus E1A proteins can dissociate heteromeric complexes involving the E2F transcription factor: a novel mechanism for E1A trans-activation. *Cell* **62**, 659-669.
- Bagchi, S., Weinmann, R. and Raychaudhuri, P. (1991). The retinoblastoma protein copurifies with E2F-1, an E1A-regulated inhibitor of the transcription factor E2F. *Cell* **65**, 1063-1072.
- Bandara, L. R. and La Thangue, N. B. (1991). Adenovirus E1a prevents the retinoblastoma gene product from complexing with a cellular transcription factor. *Nature* **351**, 494-497.
- Bandara, L. R., Buck, V. M., Zamanian, M., Johnston, L. H. and La Thangue, N. B. (1993). Functional synergy between DP-1 and E2F-1 in the cell cycle-regulating transcription factor DRTF1/E2F. *EMBO J.* **12**, 4317-4324.
- Blake, M. C. and Azizkhan, J. C. (1989). Transcription factor E2F is required for efficient expression of the hamster dihydrofolate reductase gene in vitro and in vivo. *Mol. Cell. Biol.* **9**, 4994-5002.
- Buchkovich, K., Duffy, L. A. and Harlow, E. (1989). The retinoblastoma protein is phosphorylated during specific phases of the cell cycle. *Cell* **58**, 1097-1105.
- Cao, L., Faha, B., Dembski, M., Tsai, L.-H., Harlow, E. and Dyson, N. (1992). Independent binding of the retinoblastoma protein and p107 to the transcription factor E2F. *Nature* **355**, 176-179.
- Chellappan, S., Hiebert, S., Mudryj, M., Horowitz, J. and Nevins, J. (1991). The E2F transcription factor is a cellular target for the RB protein. *Cell* **65**, 1053-1061.
- Chen, P.-L., Scully, P., Shew, J.-Y., Wang, J. and Lee, W.-H. (1989). Phosphorylation of the retinoblastoma gene product is modulated during the cell cycle and cellular differentiation. *Cell* **58**, 1193-1198.
- Cobrinik, D., Whyte, P., Peeper, D. S., Jacks, T. and Weinberg, R. A. (1993). Cell-cycle specific association of E2F with the p130 E1A-binding protein.
- Dalton, S. (1992). Cell cycle regulation of the human cdc2 gene. *EMBO J.* **11**, 1797-1804.
- DeCaprio, J. A., Ludlow, J. W., Figge, J., Shew, J. Y., Huang, C. M., Lee, W. H., Marsilio, E., Paucha, E. and Livingston, D. M. (1988). SV40 large tumor antigen forms a specific complex with the product of the retinoblastoma susceptibility gene. *Cell* **54**, 275-283.
- DeCaprio, J. A., Ludlow, J. W., Lynch, D., Furukawa, Y., Griffin, J., Piwnica-Worms, H., Huang, C. M. and Livingston, D. M. (1989). The product of the retinoblastoma susceptibility gene has properties of a cell cycle regulatory element. *Cell* **58**, 1085-1095.
- Devoto, S. H., Mudryj, M., Pines, J., Hunter, T. and Nevins, J. R. (1992). A cyclin A-protein kinase complex possesses sequence-specific DNA binding activity: p33cdk2 is a component of the E2F-cyclin A complex. *Cell* **68**, 167-176.
- Dymlacht, B. D., Brook, A., Dembski, M. S., Yenush, L. and Dyson, N. (1994). Transactivation and DNA-binding by *Drosophila* E2F and DP. *Proc. Nat. Acad. Sci. USA* **81**, 6359-6363.
- Dyson, N., Buchkovich, K., Whyte, P. and Harlow, E. (1989a). The cellular 107K protein that binds to adenovirus E1A also associates with the large T antigens of SV40 and JC virus. *Cell* **58**, 249-255.
- Dyson, N., Howley, P. M., Munger, K. and Harlow, E. (1989b). The human papilloma virus-16 E7 oncoprotein is able to bind to the retinoblastoma gene product. *Science* **243**, 934-937.
- Dyson, N., Guida, P., Munger, K. and Harlow, E. (1992). Homologous sequences in adenovirus E1A and human papillomavirus E7 proteins mediate interaction with the same set of cellular proteins. *J. Virol.* **66**, 6893-6902.
- Dyson, N., Dembski, M., Fattaey, A., Nguwu, C., Ewen, M. and Helin, K. (1993). Analysis of p107-associated proteins: p107 associates with a form of E2F that differs from pRB associated E2F-1. *J. Virol.* **67**, 7641-7647.
- Ewen, M. E., Ludlow, J. W., Marsilio, E., DeCaprio, J. A., Millikan, R. C., Cheng, S. H., Paucha, E. and Livingston, D. M. (1989). An N-terminal transformation-governing sequence of SV40 large T antigen contributes to the binding of both p110Rb and a second cellular protein, p120. *Cell* **58**, 257-67.
- Ewen, M. E., Xing, Y., Lawrence, J. B. and Livingston, D. M. (1991). Molecular cloning, chromosomal mapping, and expression of the cDNA for p107, a retinoblastoma gene product-related protein. *Cell* **66**, 1155-1164.
- Ewen, M., Faha, B., Harlow, E. and Livingston, D. (1992). Interaction of p107 with cyclin A independent of complex formation with viral oncoproteins. *Science* **255**, 85-87.
- Faha, B., Ewen, M., Tsai, L.-H., Livingston, D. and Harlow, E. (1992). Interaction between human cyclin A and adenovirus E1A-associated p107 protein. *Science* **255**, 87-90.
- Faha, B. F., Harlow, E. and Lees, E. M. (1993). The adenovirus E1A-associated kinase consists of cyclin E/p33cdk2 and cyclin A/p33cdk2. *J. Virol.* **67**, 2456-2465.
- Figge, J., Webster, T., Smith, T. F. and Paucha, E. (1988). Prediction of similar transforming regions in simian virus 40 large T, adenovirus E1A, and myc oncoproteins. *J. Virol.* **62**, 1814-1818.
- Giordano, A., Lee, J. H., Scheppler, J. A., Herrmann, C., Harlow, E., Deuschle, U., Beach, D. and Franza B. R. (1991a). Cell cycle regulation of histone H1 kinase activity associated with the adenoviral protein E1A. *Science* **253**, 1271-1275.
- Giordano, A., McCall, C., Whyte, P. and Franza, B. R. (1991b). Human cyclin A and the retinoblastoma protein interact with similar but distinguishable sequences in the adenovirus E1A gene product. *Oncogene* **6**, 481-486.
- Girling, R., Partridge, J. F., Bandara, L. R., Burden, N., Totty, N. F., Hsuan, J. J. and La Thangue, N. B. (1993). A new component of the transcription factor DRTF1/E2F. *Nature* **362**, 83-87.
- Goodrich, D. W., Wang, N. P., Qian, Y.-W., Lee, E. Y.-H. P. and Lee, W.-H. (1991). The retinoblastoma gene product regulates progression through the G1 phase of the cell cycle. *Cell* **67**, 293-302.
- Gu, W., Schneider, J. W., Condorelli, G., Kaushal, S., Mahdavi, V. and Nadal-Ginard, B. (1993). Interaction of myogenic factors and the retinoblastoma protein mediates muscle cell commitment and differentiation. *Cell* **72**, 309-324.
- Hagemeier, C., Bannister, A. J., Cook, A. and Kouzarides, T. (1993). The activation domain of transcription factor PU.1 binds the retinoblastoma (RB) protein and the transcription factor TFIID *in vitro*: RB shows sequence similarity to TFIID and TFIIB. *Proc. Nat. Acad. Sci. USA* **90**, 1580-1584.
- Hannon, G. J., Demetrick, D. and Beach, D. (1993). Isolation of the Rb-related p130 through its interaction with CDK2 and cyclins. *Genes Dev.* **7**, 2378-2391.

- Harlow, E., Whyte, P., Franza, B. J. and Schley, C. (1986). Association of adenovirus early-region 1A proteins with cellular polypeptides. *Mol. Cell Biol.* **6**, 1579-1589.
- Helin, K., Harlow, E. and Fattaey, A. R. (1993). Inhibition of E2F-1 transactivation by direct binding of the retinoblastoma protein. *Mol. Cell Biol.* **13**, 6501-6508.
- Helin, K., Lees, J. A., Vidal, M., Dyson, N., Harlow, E. and Fattaey, A. (1992). A cDNA encoding a pRB-binding protein with properties of the transcription factor E2F. *Cell* **70**, 337-350.
- Helin, K., Wu, C., Fattaey, A., Lees, J., Dynlacht, B., Ngwu, C. and Harlow, E. (1993). Heterodimerization of the transcription factors E2F-1 and DP-1 leads to cooperative transactivation. *Genes Dev.* **7**, 1850-1861.
- Helin, K. and Harlow, E. (1993). The retinoblastoma protein as a transcriptional repressor. *Trends Cell Biol.* **3**, 43-46.
- Hiebert, S. W., Lipp, M. and Nevins, J. R. (1989). E1A-dependent transactivation of the human MYC promoter is mediated by the E2F factor. *Proc. Nat. Acad. Sci. USA* **86**, 3594-3598.
- Hiebert, S. W., Chellappan, S. P., Horowitz, J. M. and Nevins, J. R. (1992). The interaction of pRB with E2F inhibits the transcriptional activity of E2F. *Genes Dev.* **6**, 177-185.
- Hinds, P. W., Mittnacht, S., Dulic, V., Arnold, A., Reed, S. I. and Weinberg, R. A. (1992). Regulation of retinoblastoma protein functions by ectopic expression of human cyclins. *Cell* **70**, 993-1006.
- Howe, J. A., Mymryk, J. S., Egan, C., Branton, P. E. and Bayley, S. T. (1990). Retinoblastoma growth suppressor and a 300-kDa protein appear to regulate cellular DNA synthesis. *Proc. Nat. Acad. Sci. USA* **87**, 5883-5887.
- Howe, J. A. and Bayley, S. (1992). Effects of Ad5 E1A mutant viruses on the cell cycle in relation to the binding of cellular proteins including the retinoblastoma protein and cyclin A. *Virology* **186**, 15-24.
- Huber, H. E., Edwards, G., Goodhart, P. J., Patrick, D. R., Huang, P. S., Ivey-Hoyle, M., Barnett, S. F., Oliff, A. and Heimbrook, D. C. (1993). Transcription factor E2F binds DNA as a heterodimer. *Proc. Nat. Acad. Sci. USA* **90**, 3525-3529.
- Ivey-Hoyle, M., Conroy, R., Huber, H., Goodhart, P., Oliff, A. and Heimbrook, D. C. (1993). Cloning and characterization of E2F-2, a novel protein with the biochemical properties of transcription factor E2F. *Mol. Cell Biol.* **13**, 7802-7812.
- Johnson, D. G., Schwartz, J. K., Cress, W. D. and Nevins, J. R. (1993). Expression of transcription factor E2F1 induces quiescent cells to enter S phase. *Nature* **365**, 349-352.
- Kaelin, W. G., Krek, W., Sellers, W. R., DeCaprio, J. A., Ajchanbaum, F., Fuchs, C. S., Chittenden, T., Li, Y., Farnham, P. J., Blunar, M. A., Livingston, D. M. and Flemington, E. K. (1992). Expression cloning of a cDNA encoding a retinoblastoma-binding protein with E2F-like properties. *Cell* **70**, 351-364.
- Kim, S.-J., Wagner, S., Liu, F., O'Reilly, M. A., Robbins, P. D. and Green, M. R. (1992). Retinoblastoma gene product activates expression of the human TGF- $\beta$ 2 gene through transcription factor ATF-2. *Nature* **358**, 331-334.
- La Thangue, N. B., Thimmappaya, B. and Rigby, P. W. J. (1990). The embryonal carcinoma stem cell E1a-like activity involves a differentiation-regulated transcription factor. *Nucl. Acids Res.* **18**, 2929-2938.
- Lam, E. W.-F. and Watson, R. J. (1993). An E2F-binding site mediates cell-cycle regulated repression of mouse B-myb transcription. *EMBO J.* **12**, 2705-2713.
- Larose, A., St-Onge, L. and Bastin, M. (1990). Mutations in polyomavirus large T affecting immortalization of primary rat embryo fibroblasts. *Virology* **176**, 98-105.
- Lees, E., Faha, B., Dulic, V., Reed, S. I. and Harlow, E. (1992). Cyclin E/cdk2 and cyclin A/cdk2 kinases associate with p107 and E2F in a temporally distinct manner. *Genes Dev.* **6**, 1874-1885.
- Lees, J. A., Saito, M., Vidal, M., Valentine, M., Look, T., Harlow, E., Dyson, N. and Helin, K. (1993). The retinoblastoma protein binds to a family of E2F transcription factors. *Mol. Cell Biol.* **13**, 7813-7825.
- Lewis, J. B. and Mathews, M. B. (1980). Control of adenovirus early gene expression: a class of immediate early products. *Cell* **21**, 303-313.
- Li, Y., Graham, C., Lacy, S., Duncan, A. M. V. and Whyte, P. (1993). The adenovirus E1A-associated 130-kD protein is encoded by a member of the retinoblastoma gene family and physically interacts with cyclins A and E. *Genes Dev.* **7**, 2366-2377.
- Mayol, X., Grana, X., Baldi, A., Sang, N., Hu, Q. and Giordano, A. (1993). Cloning of a new member of the retinoblastoma gene family (pRb2) which binds to the E1A transforming domain. *Oncogene* **8**, 2561-6.
- Means, A. L., Slansky, J. E., McMahon, S. L., Knuth, M. W. and Farnham, P. J. (1992). The HIP binding site is required for growth regulation of the dihydrofolate reductase promoter. *Mol. Cell Biol.* **12**, 1054-1063.
- Mihara, K., Cao, X. R., Yen, A., Chandler, S., Driscoll, B., Murphree, A. L., T'Ang, A. and Fung, Y. K. (1989). Cell cycle-dependent regulation of phosphorylation of the human retinoblastoma gene product. *Science* **246**, 1300-1303.
- Mudryj, M., Devoto, S. H., Hiebert, S. W., Hunter, T., Pines, J. and Nevins, J. R. (1991). Cell cycle regulation of the E2F transcription factor involves an interaction with cyclin A. *Cell* **65**, 1243-1253.
- Munger, K., Werness, B. A., Dyson, N., Phelps, W. C., Harlow, E. and Howley, P. M. (1989). Complex formation of human papillomavirus E7 proteins with the retinoblastoma tumor suppressor gene product. *EMBO J.* **8**, 4099-105.
- Nevins, J. R. (1981). Mechanism of activation of early viral transcription by the adenovirus E1A gene product. *Cell* **26**, 213-220.
- Nevins, J. R. (1992). E2F; A link between the Rb Tumor suppressor protein and viral oncoproteins. *Science* **258**, 424-429.
- Phelps, W. C., Yee, C. L., Munger, K. and Howley, P. M. (1988). The human papillomavirus type 16 E7 gene encodes transactivation and transformation functions similar to those of adenovirus E1A. *Cell* **53**, 539-47.
- Ray, S., Arroyo, K. M., Bagchi, S. and Raychaudhuri, P. (1992). Identification of a 60-kilodalton Rb-binding protein that allows the RB-E2F complex to bind to DNA. *Mol. Cell Biol.* **12**, 4327-4333.
- Raychaudhuri, P., Bagchi, S., Devoto, S. H., Kraus, V. B., Moran, E. and Nevins, J. R. (1991). Domains of the adenovirus E1A protein that are required for oncogenic activity are also required for dissociation of E2F transcription factor complexes. *Genes Dev.* **5**, 1200-1211.
- Rustgi, A. K., Dyson, N. J. and Bernards, R. (1991). Amino-terminal domains of c-myc and N-myc proteins mediate binding to the retinoblastoma gene product. *Nature* **352**, 541-544.
- Saito, M., Helin, K., Valentine, M., Griffith, B., Willman, C., Harlow, E. and Look, T. (1994). Amplification of the E2F-1 transcription factor gene in the HEL erythroleukemia cell line. *Blood* (in press).
- Schwarz, J. K., Devoto, S. H., Smith, E. J., Chellappan, S. P., Jakoi, L. and Nevins, J. R. (1993). Interactions of the p107 and Rb proteins with E2F during the cell proliferation response. *EMBO J.* **12**, 1013-1020.
- Shan, B., Zhu, X., Chen, P.-L., Durfee, T., Yang, Y., Sharp, D. and Lee, W.-H. (1992). Molecular cloning of cellular genes encoding retinoblastoma-associated proteins: identification of a gene with properties of the transcription factor E2F. *Mol. Cell Biol.* **12**, 5620-5631.
- Shirodkar, S., Ewen, M., DeCaprio, J. A., Morgan, D., Livingston, D. and Chittenden, T. (1992). The transcription factor E2F interacts with the retinoblastoma product and a p107-cyclin A complex in a cell cycle-regulated manner. *Cell* **68**, 157-166.
- Slansky, J., Li, Y., Kaelin, W. G. and Farnham, P. J. (1993). A protein synthesis-dependent increase in E2F1 mRNA correlates with growth regulation of the dihydrofolate reductase promoter. *Mol. Cell Biol.* **13**, 1610-1618.
- Stabel, S., Argos, P. and Philipson, K. (1985). The release of growth arrest by microinjection of adenovirus E1A DNA. *EMBO J.* **4**, 2329-2336.
- Thalmeier, K., Synovzik, H., Mertz, R., Winnacker, E.-L. and Lipp, M. (1989). Nuclear factor E2F mediates basic transcription and trans-activation by E1a of the human MYC promoter. *Genes Dev.* **3**, 527-536.
- Wang, C.-J., Petryniak, B., Thompson, C. B., Kaelin, W. G. and Leiden, J. M. (1993). Regulation of the Ets-related transcription factor Elf-1 by binding to the retinoblastoma protein. *Science* **260**, 1130-1135.
- Weinberg, R. A. (1988). Finding the anti-oncogene. *Sci. Am.* **259**, 44-51.
- Weinberg, R. A. (1990). The retinoblastoma gene and cell growth control. *Trends Biochem. Sci.* **15**, 199-202.
- Weinberg, R. A. (1992). The retinoblastoma gene and gene product. In *Tumour Suppressor Genes, the Cell Cycle and Cancer*. pp. 43-57. New York, Cold Spring Harbor Laboratory Press.
- Weintraub, S. J., Prater, C. A. and Dean, D. C. (1992). Retinoblastoma protein switches the E2F site from positive to negative element. *Nature* **358**, 259-261.
- Welch, P. J. and Wang, J. Y. J. (1993). A C-terminal protein-binding domain in the retinoblastoma protein regulates nuclear c-abl tyrosine kinase in the cell cycle. *Cell* **75**, 779-790.
- Whyte, P., Buchkovich, K. J., Horowitz, J. M., Friend, S. H., Raybuck, M., Weinberg, R. A. and Harlow, E. (1988). Association between an oncogene and an anti-oncogene: the adenovirus E1A proteins bind to the retinoblastoma gene product. *Nature* **334**, 124-129.
- Whyte, P., Williamson, N. M. and Harlow, E. (1989). Cellular targets for transformation by the adenovirus E1A proteins. *Cell* **56**, 67-75.
- Yee, S. P. and Branton, P. E. (1985). Detection of cellular proteins associated

- with human adenovirus type 5 early region 1A polypeptides. *Virology* **147**, 142-153.
- Yee, A. S., Reichel, R., Kovetski, I. and Nevins, J. R.** (1987). Promoter interaction of the E1A-inducible factor E2F and its potential role in the formation of a multi-component complex. *EMBO J.* **6**, 2061-2068.
- Yee, A. S., Raychaudhuri, P., Jakoi, L. and Nevins, J. R.** (1989). The adenovirus-inducible factor E2F stimulates transcription after specific DNA binding. *Mol. Cell Biol.* **9**, 578-585.
- Zamanian, M. and La Thangue, N. B.** (1992). Adenovirus E1A prevents the retinoblastoma gene product from repressing the activity of a cellular transcription factor. *EMBO J.* **11**, 2603-2610.
- Zamanian, M. and Thangue, N. B. L.** (1993). Transcriptional repression by the Rb-related protein p107. *Mol. Biol. Cell* **4**, 389-396.
- Zhu, L., van den Heuvel, S., Helin, K., Fattaey, A., Ewen, M., Livingston, D., Dyson, N. and Harlow, E.** (1993). Inhibition of cell proliferation by p107, a relative of the retinoblastoma protein. *Genes Dev.* **7**, 1111-1125.
